# Plasma growth hormone is a potential biomarker of response to atezolizumab and bevacizumab in advanced hepatocellular carcinoma patients

Yehia I. Mohamed<sup>1</sup>, Dan G. Duda<sup>2</sup>, Muhammad O. Awiwi<sup>3</sup>, Sunyoung S. Lee<sup>1</sup>, Lina Altameemi<sup>4</sup>, Lianchun Xiao<sup>5</sup>, Jeffrey S. Morris<sup>6</sup>, Robert A. Wolff<sup>1</sup>, Khaled M. Elsayes<sup>3</sup>, Rikita I. Hatia<sup>7</sup>, Aliya Qayyum<sup>3</sup>, Shadi M. Chamseddine<sup>1</sup>, Asif Rashid<sup>8</sup>, James C. Yao<sup>1</sup>, Armeen Mahvash<sup>9</sup>, Manal M. Hassan<sup>7</sup>, Hesham M. Amin<sup>10</sup> and Ahmed Omar Kaseb<sup>1</sup>

<sup>1</sup>Department of Gastrointestinal Medical Oncology, The University of Texas MD Anderson Cancer Center, Houston, TX 77030, USA

<sup>2</sup>Steele Laboratories, Department of Radiation Oncology, Massachusetts General Hospital and Harvard Medical School, Boston, MA 02114, USA

<sup>3</sup>Department of Diagnostic Imaging, The University of Texas MD Anderson Cancer Center, Houston, TX 77030, USA

<sup>4</sup>Hurley Medical Center, Michigan State University, East Lansing, MI 48824, USA

<sup>5</sup>Department of Biostatistics, The University of Texas MD Anderson Cancer Center, Houston, TX 77030, USA

<sup>6</sup>Department of Biostatistics, Epidemiology, and Biostatistics, University of Pennsylvania Perelman School of Medicine, Philadelphia, PA 19104, USA

<sup>7</sup>Department of Epidemiology, The University of Texas MD Anderson Cancer Center, Houston, TX 77030, USA

<sup>8</sup>Department of Pathology, The University of Texas MD Anderson Cancer Center, Houston, TX 77030, USA

<sup>9</sup>Department of Interventional Radiology, Division of Diagnostic Imaging, MD Anderson Cancer Center, Houston, TX 77030, USA

<sup>10</sup>Department of Hematopathology, The University of Texas MD Anderson Cancer Center, Houston, TX 77030, USA

**Correspondence to:** Ahmed Omar Kaseb, *email:* akaseb@mdanderson.org

**Keywords:** growth hormone; hepatocellular carcinoma; immunotherapy; atezolizumab; bevacizumab

**Received:** September 01, 2022

**Accepted:** November 23, 2022

**Published:** December 06, 2022

**Copyright:** © 2022 Mohamed et al. This is an open access article distributed under the terms of the [Creative Commons Attribution License](https://creativecommons.org/licenses/by/3.0/) (CC BY 3.0), which permits unrestricted use, distribution, and reproduction in any medium, provided the original author and source are credited.

## ABSTRACT

**Introduction:** Hepatocellular carcinoma (HCC) has limited systemic therapy options when discovered at an advanced stage. Thus, there is a need for accessible and minimally invasive biomarkers of response to guide the selection of patients for treatment. This study investigated the biomarker value of plasma growth hormone (GH) level as a potential biomarker to predict outcome in unresectable HCC patients treated with current standard therapy, atezolizumab plus bevacizumab (Atezo/Bev).

**Materials and Methods:** Study included unresectable HCC patients scheduled to receive Atezo/Bev. Patients were followed to determine progression-free survival (PFS) and overall survival (OS). Plasma GH levels were measured by ELISA and used to stratify the HCC patients into GH-high and GH-low groups (the cutoff normal GH levels in women and men are  $\leq 3.7$   $\mu\text{g/L}$  and  $\leq 0.9$   $\mu\text{g/L}$ , respectively). Kaplan-Meier method was used to calculate median OS and PFS and Log rank test was used to compare survival outcomes between GH-high and -low groups.

**Results:** Thirty-seven patients were included in this analysis, of whom 31 were males and 6 females, with a median age of 67 years (range: 37–80). At the time of the analysis, the one-year survival rate was 70% (95% CI: 0.51, 0.96) among GH low patients and 33% (95% CI: 0.16, 0.67) among GH high patients. OS was significantly

**superior in GH-low compared to GH-high patients (median OS: 18.9 vs. 9.3 months;  $p = 0.014$ ). PFS showed a non-significant trend in favor of GH-low patients compared to the GH-high group (median PFS: 6.6 vs. 2.9 months;  $p = 0.053$ ).**

**Discussion and conclusions: Plasma GH is a biomarker candidate for predicting treatment outcomes in advanced HCC patients treated with Atezo/Bev. This finding should be further validated in larger randomized clinical trials in advanced HCC patients.**

## INTRODUCTION

Hepatocellular carcinoma (HCC) is one of the most common cancers worldwide and the fourth leading cause of cancer related mortality [1], with more than 80% of patients diagnosed at an advanced unresectable stage and curative options such as surgical resection and liver transplantation are excluded at these advanced stages, and therefore only limited effective treatment options remain [2]. Sorafenib and recently lenvatinib, have been approved as first line systemic treatment options for advanced HCC patients, as evidenced by several studies demonstrating the survival benefit of sorafenib and lenvatinib treatment [3]. The SHARP trial has demonstrated the survival benefit of sorafenib compared to placebo. In addition, lenvatinib was proven to be non-inferior to sorafenib in term of OS in the REFLECT trial [3, 4].

Outcomes of the IMbrave 150 trial changed the landscape for unresectable HCC treatment by showing superior overall survival (OS) and progression-free survival (PFS) in HCC patients receiving atezolizumab and bevacizumab (Atezo/Bev) compared to sorafenib with an acceptable adverse event profile [5, 6]. Hence, Atezo/Bev has become the first-line treatment option for patients with unresectable HCC.

GHR has been associated with different malignancies and disease progression (including breast cancer and HCC) [7–10]. Notably, the important role of growth hormone (GH)/growth hormone receptor (GHR) signaling in HCC development and tumor burden has been recently described by our group [7].

Many studies have demonstrated the efficacy and safety of Atezo/Bev in advanced HCC. However, there is a significant research gap in regard the biomarker value of plasma GH level in advanced HCC patients treated with atezolizumab plus bevacizumab. The present study was designed to investigate the association between GH levels and overall survivals (OS) and progression free survival (PFS) in HCC patients treated with current standard, atezolizumab plus bevacizumab.

## RESULTS

The study included 37 patients with advanced HCC who received atezolizumab plus bevacizumab at MDACC between June 2018 to November 2021 of whom 45.9% were 61–70 years of age at the time of diagnosis

with a median age of 67 years (range: 37, 80), and 83.8% were males.

The characteristics of these patients were documented at the time of atezolizumab plus bevacizumab administration with 81% of patients had an Eastern Cooperative Oncology Group Performance Status (ECOG PS) score of 0, and 19% had a score of 1. Most of these patients had Child–Pugh classification A (78.4%), and only 8 (21.6%) patients had Child–Pugh classification B. The demographic characteristics of the patients are presented in Table 1.

### Overall survival (OS)

GH levels for all patients were measured. At the time of the analysis, 22 of the 37 patients died, and the estimated median OS time was 12.16 months (95% CI: 9.26, NA). The estimated 1-year OS probability was 52% (95% CI: 0.37, 0.72). The median follow-up time was 18.8 months (95% CI: 15.3, NA). Fifteen of the 19 GH-high patients died, the median OS was 9.26 months (95% CI: 7.59, 14.59). Seven of the 18 GH-low patients died, median OS was 18.92 months (95% CI: 18.46, NA) (log rank test  $p = 0.0141$ ). Table 2. Figure 1.

### Progression free survival (PFS)

Thirty-two of the 37 patients had PD or died, the estimated median PFS time was 3.12 months (95% CI: 2.69, 8.74). The estimated 6-month PFS probability was 40% (95% CI: 0.27, 0.6). Eighteen of the 19 GH-high patients had PD or died with a median PFS of 2.92 months (95% CI: 2.27, 7.56). Fourteen of the 18 GH-low patients had PD or died with a median PFS of 6.64 months (95% CI: 2.69, NA) (log rank test  $p = 0.0526$ ). Table 3. Figure 2.

## DISCUSSION

In this study, we introduced a novel serum candidate biomarker, which is relatively cheap and minimally-invasive that can serve as a biological supplement to the already available prognostic factors to guide the selection of patients for treatment. Despite the small data size, plasma GH levels were strongly predictive of the disease outcome in patients treated with Atezo/Bev. This observation warrants validation studies which may eventually suggest a change in patient selection who could

**Table 1: Baseline clinical characteristics of patients with hepatocellular carcinoma treated with atezolizumab plus bevacizumab**

| Variable                                  | Number of patients (%) |
|-------------------------------------------|------------------------|
| <b>Age, years</b>                         |                        |
| ≤ 40                                      | 1 (2.7)                |
| 41–50                                     | 1 (2.7)                |
| 51–60                                     | 5 (13.5)               |
| 61–70                                     | 17 (45.9)              |
| > 70                                      | 13 (35.1)              |
| <b>Diabetes</b>                           |                        |
| No                                        | 27 (72.9)              |
| Yes                                       | 10 (27.1)              |
| <b>Sex</b>                                |                        |
| Female                                    | 6 (16.2%)              |
| Male                                      | 31 (83.8%)             |
| <b>History of drinking alcohol</b>        |                        |
| No                                        | 26 (70.2)              |
| Yes                                       | 11 (29.7)              |
| <b>Family history of liver cancer</b>     |                        |
| No                                        | 30 (81)                |
| Yes                                       | 6 (16.2)               |
| Unknown                                   | 1 (2.7)                |
| <b>Personal History of non-HCC cancer</b> |                        |
| No                                        | 27 (72.9)              |
| Yes                                       | 10 (27.1)              |
| <b>Race</b>                               |                        |
| Asian                                     | 4 (10.8)               |
| Black                                     | 5 (13.5)               |
| White                                     | 25 (67.5)              |
| Unknown                                   | 3 (8.1)                |
| <b>History of tobacco use</b>             |                        |
| No                                        | 17 (45.9)              |
| Yes                                       | 20 (54)                |
| <b>Ascites</b>                            |                        |
| None                                      | 28 (75.6)              |
| Slight                                    | 9 (24.3)               |
| <b>Evidence of cirrhosis</b>              |                        |
| No                                        | 8 (21.6)               |
| Yes                                       | 28 (75.6)              |
| Unknown                                   | 1 (2.7)                |
| <b>ECOG performance status</b>            |                        |
| 0                                         | 30 (81)                |
| 1                                         | 7 (19)                 |

|                   |            |
|-------------------|------------|
| <b>CTP class</b>  |            |
| A                 | 29 (78.4%) |
| B                 | 8 (21.6%)  |
| <b>Metastasis</b> |            |
| No                | 24 (64.9%) |
| Yes               | 13 (35.1%) |

Abbreviations: CTP: Child-Turcotte-Pugh; ECOG: Eastern Cooperative Oncology Group; HCC: Hepatocellular carcinoma.

**Table 2: Comparison of OS between GH-high and GH-low patients**

|              | <i>N</i> | Event | Median OS<br>(95% CI) (months) | 1-year OS Rate<br>(95% CI) | 2-year OS Rate<br>(95% CI) | <i>p</i> -value |
|--------------|----------|-------|--------------------------------|----------------------------|----------------------------|-----------------|
| All patients | 37       |       | 12.16 (9.26, N/A)              | 52% (37–72)                | 30% (16–55)                |                 |
| <b>High</b>  | 19       | 15    | 9.26 (7.59–14.59)              | 33% (16–67)                | 13% (4–48)                 | 0.0141          |
| <b>Low</b>   | 18       | 7     | 18.92 (18.46-N/A)              | 70% (51–96)                | 44% (21–92)                |                 |

Abbreviations: GH: Growth Hormone; OS: overall survival; N/A: not applicable.

benefit from targeting GH/GHR signaling pathway and may provide an important prognostic biomarker for the selected patients.

Atezo/Bev regimen emerged as the preferred front-line treatment for advanced HCC as demonstrated by the IMbrave150 clinical trial [5], which enrolled advanced HCC patients to receive either the combination or

sorafenib only. Atezo/Bev was tolerable and reported to be associated with some adverse events such as bleeding, hypertension, and proteinuria episodes, while sorafenib had more gastrointestinal and skin toxicities [5, 6]. Thus, choosing the right treatment for advanced HCC patient has to be weighed for risk-benefit ratio, in addition to comorbidities and tumor burden.

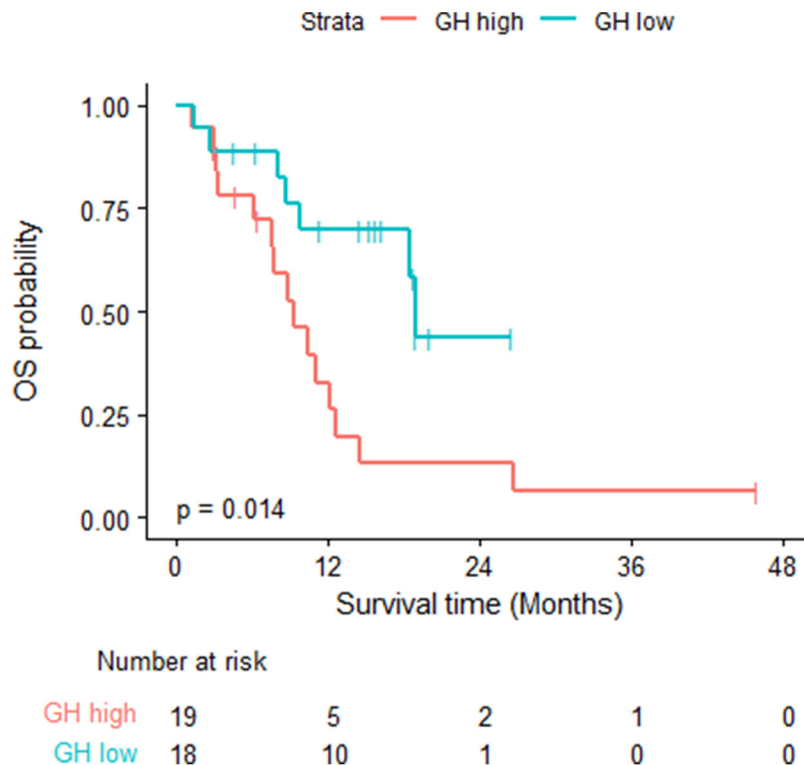

**Figure 1: Overall survival- log rank test was used; fifteen of the 19 GH-high patients died, the median OS was 9.26 months (95% CI: 7.59, 14.59). Seven of the 18 GH-low patients died, median OS was 18.92 months (95% CI: 18.46, NA) (log rank test *p* = 0.0141).**

**Table 3: Comparison of PFS between GH-high and GH-low patients**

| Plasma GH level | N  | Event | Median PFS (95% CI) (months) | 6-month PFS (95% CI) | p-value |
|-----------------|----|-------|------------------------------|----------------------|---------|
| All patients    | 37 |       | 3.12 (2.69, 8.74)            | 40% (27, 60)         |         |
| High            | 19 | 18    | 2.92 (2.27–7.56)             | 30% (15–61)          | 0.0526  |
| Low             | 18 | 14    | 6.64 (2.69-N/A)              | 50% (32–79)          |         |

Abbreviations: GH: Growth Hormone; PFS: Progression-free survival; N/A: not applicable.

Systemic therapy in HCC carries a high cost, which adds a financial burden to the patients and healthcare systems [11]. Thus, it is important to know which patients will benefit from atezolizumab plus bevacizumab versus those in whom this combination will have lower survival benefit.

Despite this recent breakthrough in the treatment of patients with advanced HCC, there remains an unmet need for reliable biomarkers of response to immunotherapy. GH level have been reported and validated as a prognostic marker in HCC patients [7, 12, 13]. Our group reported in previous studies the prognostic value of circulating GH level in all 767 patients with different disease stages and treatment modalities received and also compared them to healthy volunteers (200 cases) [2, 13]. Our group also

recently reported a significant correlation between GH level and overall survival [12]. Higher plasma GH levels were significantly correlated with thrombosis ( $p = .004$ ), vascular invasion ( $p < .001$ ) and tumor involvement of >50% liver ( $p = .003$ ) and more advanced BCLC ( $p < .001$ ) and TNM staging ( $p < .001$ ). Median overall survival of patients without cirrhosis with GH-high levels was 13.1 months vs. 37.4 months for patients with plasma GH-low levels ( $p < .001$ ).

In this study, we demonstrated the immediate clinical utility of the plasma GH level in patients treated with Atezo/Bev. Plasma GH level were independent prognostic factors in patients with advanced HCC patients who received atezolizumab plus bevacizumab. Revealing the prognostic value of plasma GH level for patients with

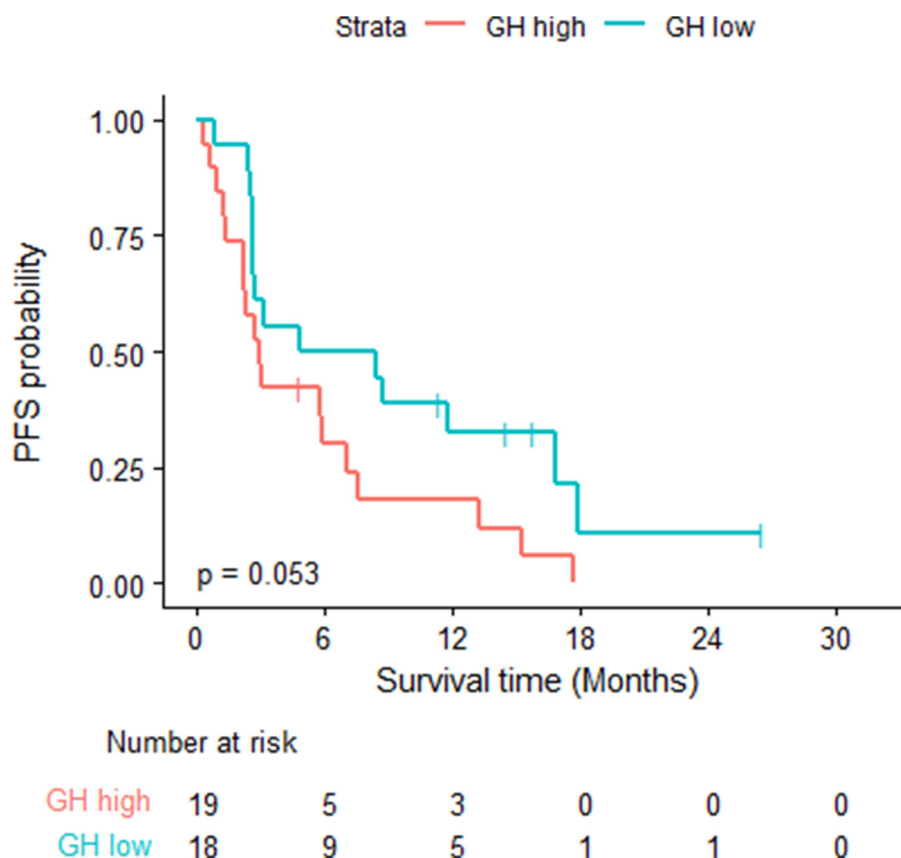

**Figure 2: Progression free survival- log rank test was used; eighteen of the 19 GH-high patients had PD or died with a median PFS of 2.92 months (95% CI: 2.27, 7.56). 14 of the 18 GH-low patients had PD or died with a median PFS of 6.64 months (95% CI: 2.69, NA) (log rank test  $p = 0.0526$ ).**

advanced HCC in real-world clinical practice. Our study is the first to report GH level association with outcomes among patients with HCC treated with Atezo/Bev.

Patients with GH-high levels had significantly worse OS compared to those with lower level (9.27 months vs. 18.92 months) ( $P = 0.014$ ). Patients with GH-high level had worse PFS compared to those with lower levels of plasma GH (2.92 months vs. 6.64 months) ( $P = 0.053$ ). These results provides evidence of the clinical benefit of plasma GH as a biomarker for prediction and prognosis of patients with advanced HCC treated with Atezo/Bev.

Our study has some limitations. First, this investigation was conducted at a single center study in a selected population. Second, we have a small sample size of patients who have received the combination atezolizumab plus bevacizumab, which led to insufficient power to reach statistical significance for PFS, however, it showed a non-significant trend in favor of patients with plasma GH-low levels versus those with GH-high levels. A larger sample size with enough power will be required to validate these observations and confirm our results. Also, GH level has been reported to be associated with other systemic diseases, and therefore, future prospective studies are essential to study any interaction between different comorbidities and GH level in HCC patients and their potential effect on outcome.

To the best of our knowledge, this is the first study to assess clinical prognostic value of plasma GH level in patients who have received atezolizumab plus bevacizumab in clinical setting. Thus, the results of this study provide evidence to suggest the clinical utility of plasma GH as a potential noninvasive biomarker for prediction of OS and PFS in patients with HCC treated with Atezo/Bev. More importantly, it provides the basis to investigate the potential integration of anti-GH strategies, such as pegvisomant; a short peptide that inhibits the GH/GHR signaling and is the only drug approved by FDA to treat acromegaly [14], into systemic therapy approaches in HCC. Our group recently reported that GHR signaling could be a potential successful target in HCC [13].

Although this study focused on its baseline prognostic value, serial plasma GH level evaluation in future studies may also provide useful data to eventually guide therapy decision in clinical routine practice.

In conclusion, our study demonstrate that plasma GH represents a candidate biomarker for predicting treatment outcomes in patients with advanced HCC treated with Atezo/Bev. Future studies in larger randomized clinical trial and with a more diverse ethnic, race, and gender background are warranted to further validate these findings.

## MATERIALS AND METHODS

The University of Texas MD Anderson Cancer Center's Institutional Review Board approved this study, and informed consent was obtained from all enrolled

patients. We prospectively collected and measured pretreatment plasma GH levels of HCC patients who were treated with atezo/bev and followed up until progression and/or death and analyze correlation with pretreatment GH level. Patients received atezolizumab at a dose of 1200 mg and bevacizumab at a dose of 15 mg/kg intravenously every 3 weeks. Treatment continued until disease progression or the development of intolerable adverse events (AEs).

Adult patients with pathologically or radiologically confirmed HCC, as defined by the American Association for the Study of Liver Diseases, who were treated at MD Anderson Cancer Center (MDACC) from June 2018 to November 2021 and had pretreatment plasma GH level available were included in the study. Patients' blood samples and epidemiologic and clinical data were collected, and plasma samples were analyzed retrospectively for GH level. Plasma GH levels were measured using an enzyme-linked immunosorbent assay (ELISA) and were used to stratify the HCC patients into high and low GH values (GH-high cutoff for women,  $>3.7 \mu\text{g/L}$ ; men,  $>0.9 \mu\text{g/L}$ ). Clinical and epidemiological data were retrieved from medical records. PFS was calculated from the date that Atezo/Bev treatment began to the date of disease progression or death, whichever occurred first. OS was calculated from the date that Atezo/Bev treatment began to the date of death or to the date of the last follow-up visit. The Kaplan-Meier method was used to calculate the time to event outcomes (i.e., OS and PFS) with Log rank test to compare OS or PFS between subgroups. This study was approved by MD Anderson Cancer Center's Institutional Review Board.

## Abbreviations

CTP: Child-Turcotte-Pugh; ECOG: Eastern Cooperative Oncology Group; GH: Growth hormone; HCC: Hepatocellular carcinoma; HR: Hazard ratio; N/A: Not applicable; OS: Overall survival; PFS: Progression-free survival.

## Author contributions

Study concept, design, and supervision: Ahmed O. Kaseb. Acquisition of data: Yehia I. Mohamed, Manal M. Hassan, Ahmed O. Kaseb. Analysis and interpretation of data: Yehia I. Mohamed, Manal M. Hassan, Lianchun Xiao, Ahmed O. Kaseb. Drafting of the manuscript: Yehia I. Mohamed, MD, Sunyoung Lee, Lianchun Xiao, Hesham Amin, Dan G. Duda Aliya Qayyum, Rikita Hiata, Armeen Mahvash, Sunyoung S. Lee, Shadi M. Chamseddine, Asif Rashid, Khaled M. Elsayes, Robert A. Wolff, Jeffrey S. Morris, James Yao, Hesham M. Amin, Ahmed O. Kaseb. Critical revision of the manuscript for important intellectual content: Yehia I. Mohamed, Sunyoung Lee, Lianchun Xiao, Manal M. Hassan, Aliya Qayyum, Rikita Hiata, Lina Altameemi, Asif Rashid,



Dan G. Duda, Muhammad Awiwi, Robert A. Wolff, Jeffrey S. Morris, James Yao, Hesham M. Amin, Armeen Mahvash, Ahmed O. Kaseb. Statistical analysis: Yehia I. Mohamed, Manal M. Hassan, Lianchun Xiao, Jeffrey S. Morris. Administrative, technical, or material support: Sunyoung Lee, Lianchun Xiao, Manal M. Hassan, Aliya Qayyum, Rikita Hiata, Sunyoung S Lee, Lina Altameemi, Muhammad Awiwi, Asif Rashid, Dan G. Duda, Robert A. Wolff, Jeffrey S. Morris, James Yao, Hesham M. Amin, Ahmed O. Kaseb.

## CONFLICTS OF INTEREST

D.G. Duda reports personal fees from Innocoll; grants from Surface Oncology, BMS, Bayer HealthCare, and Exelixis outside the submitted work. All other authors report no commercial associations (e.g., consultancies, stock ownership, equity interests, or patent-licensing arrangements) that might pose a conflict of interest in connection with the submitted article.

## Ethical statement and consent

The University of Texas MD Anderson Cancer Center's Institutional Review Board approved this study, and informed consent was obtained from all enrolled patients.

## FUNDING

R01 CA260872(AOK, HMA). The University of Texas MD Anderson Cancer Center, SPORE in HCC, NCI# P50CA217674-01A1(AOK). D.G. Duda's work is supported through NIH (grant nos. R01CA260872, R01CA260857, and R01CA247441) and by Department of Defense PRCRP (grant nos. W81XWH-19-438 1-0284, W81XWH1910482, and W81XWH-21-1-0738).

## REFERENCES

1. Kaseb AO, Hasanov E, Cao HST, Xiao L, Vauthey JN, Lee SS, Yavuz BG, Mohamed YI, Qayyum A, Jindal S, Duan F, Basu S, Yadav SS, et al. Perioperative nivolumab monotherapy versus nivolumab plus ipilimumab in resectable hepatocellular carcinoma: a randomised, open-label, phase 2 trial. *Lancet Gastroenterol Hepatol.* 2022; 7:208–18. [https://doi.org/10.1016/S2468-1253\(21\)00427-1](https://doi.org/10.1016/S2468-1253(21)00427-1). [PubMed]
2. Morris JS, Hassan MM, Zohner YE, Wang Z, Xiao L, Rashid A, Haque A, Abdel-Wahab R, Mohamed YI, Ballard KL, Wolff RA, George B, Li L, et al. HepatoScore-14: Measures of Biological Heterogeneity Significantly Improve Prediction of Hepatocellular Carcinoma Risk. *Hepatology.* 2021; 73:2278–92. <https://doi.org/10.1002/hep.31555>. [PubMed]
3. Lee SW, Yang SS, Lien HC, Peng YC, Ko CW, Lee TY. Efficacy of Lenvatinib and Sorafenib in the Real-World First-Line Treatment of Advanced-Stage Hepatocellular Carcinoma in a Taiwanese Population. *J Clin Med.* 2022; 11:1444. <https://doi.org/10.3390/jcm11051444>. [PubMed]
4. Kudo M, Finn RS, Qin S, Han KH, Ikeda K, Piscaglia F, Baron A, Park JW, Han G, Jassem J, Blanc JF, Vogel A, Komov D, et al. Lenvatinib versus sorafenib in first-line treatment of patients with unresectable hepatocellular carcinoma: a randomised phase 3 non-inferiority trial. *Lancet.* 2018; 391:1163–73. [https://doi.org/10.1016/S0140-6736\(18\)30207-1](https://doi.org/10.1016/S0140-6736(18)30207-1). [PubMed]
5. Finn RS, Qin S, Ikeda M, Galle PR, Ducreux M, Kim TY, Kudo M, Breder V, Merle P, Kaseb AO, Li D, Verret W, Xu DZ, et al. Atezolizumab plus Bevacizumab in Unresectable Hepatocellular Carcinoma. *N Engl J Med.* 2020; 382:1894–905. <https://doi.org/10.1056/NEJMoa1915745>. [PubMed]
6. Finn RS, Qin S, Ikeda M, Galle PR, Ducreux M, Kim TY, Lim HY, Kudo M, Breder VV, Merle P, Kaseb AO, Li D, Verret W, et al. IMbrave150: Updated overall survival (OS) data from a global, randomized, open-label phase III study of atezolizumab (atezo) + bevacizumab (bev) versus sorafenib (sor) in patients (pts) with unresectable hepatocellular carcinoma (HCC). *J Clin Oncol.* 2021; 39:267. [https://doi.org/10.1200/JCO.2021.39.3\\_suppl.267](https://doi.org/10.1200/JCO.2021.39.3_suppl.267).
7. Haque A, Sahu V, Lombardo JL, Xiao L, George B, Wolff RA, Morris JS, Rashid A, Kopchick JJ, Kaseb AO, Amin HM. Disruption of Growth Hormone Receptor Signaling Abrogates Hepatocellular Carcinoma Development. *J Hepatocell Carcinoma.* 2022; 9:823–37. <https://doi.org/10.2147/JHC.S368208>. [PubMed]
8. Kopchick JJ, List EO, Kelder B, Gosney ES, Berryman DE. Evaluation of growth hormone (GH) action in mice: discovery of GH receptor antagonists and clinical indications. *Mol Cell Endocrinol.* 2014; 386:34–45. <https://doi.org/10.1016/j.mce.2013.09.004>. [PubMed]
9. Baik M, Yu JH, Hennighausen L. Growth hormone-STAT5 regulation of growth, hepatocellular carcinoma, and liver metabolism. *Ann N Y Acad Sci.* 2011; 1229:29–37. <https://doi.org/10.1111/j.1749-6632.2011.06100.x>. [PubMed]
10. Subramani R, Nandy SB, Pedroza DA, Lakshmanaswamy R. Role of Growth Hormone in Breast Cancer. *Endocrinology.* 2017; 158:1543–55. <https://doi.org/10.1210/en.2016-1928>. [PubMed]
11. Sherrow C, Attwood K, Zhou K, Mukherjee S, Iyer R, Fountzilias C. Sequencing Systemic Therapy Pathways for Advanced Hepatocellular Carcinoma: A Cost Effectiveness Analysis. *Liver Cancer.* 2020; 9:549–62. <https://doi.org/10.1159/000508485>. [PubMed]
12. Carmagnani Pestana R, Hassan M, Abdel-Wahab R, Abugabal YI, Girard L, Hatia R, Nguyen V, Raghav KPS, Morris J, Rashid A, Wolff RA, Amin HM, Kaseb AO. Plasma GH as a diagnostic and prognostic biomarker in HCC without cirrhosis. *J Clin Oncol.* 2019; 37:227. [https://doi.org/10.1200/JCO.2019.37.4\\_suppl.227](https://doi.org/10.1200/JCO.2019.37.4_suppl.227).

13. Kaseb AO, Haque A, Vishwamitra D, Hassan MM, Xiao L, George B, Sahu V, Mohamed YI, Carmagnani Pestana R, Lombardo JL, Avritscher R, Yao JC, Wolff RA, et al. Blockade of growth hormone receptor signaling by using pegvisomant: A functional therapeutic strategy in hepatocellular carcinoma. *Front Oncol.* 2022; 12:986305. <https://doi.org/10.3389/fonc.2022.986305>. [PubMed]
14. Trainer PJ, Drake WM, Katznelson L, Freda PU, Herman-Bonert V, van der Lely AJ, Dimaraki EV, Stewart PM, Friend KE, Vance ML, Besser GM, Scarlett JA, Thorner MO, et al. Treatment of acromegaly with the growth hormone-receptor antagonist pegvisomant. *N Engl J Med.* 2000; 342:1171–77. <https://doi.org/10.1056/NEJM200004203421604>. [PubMed]
